# CORRECTION

## Correction: Towards Developing an Initial Programme Theory: Programme Designers and Managers Assumptions on the Antiretroviral Treatment Adherence Club Programme in Primary Health Care Facilities in the Metropolitan Area of Western Cape Province, South Africa

The *PLOS ONE* Staff

### Notice of Republication

This article was republished on October 21, 2016 to correct errors in figures that were introduced during the typesetting process. The publisher apologizes for the errors. Please download this article again to view the correct version. The originally published, uncorrected article and the republished, corrected article are provided here for reference.

### Supporting Information

**S1 File. Originally published, uncorrected article.**  
(PDF)

**S2 File. Republished, corrected article.**  
(PDF)

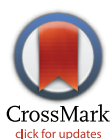

### OPEN ACCESS

**Citation:** The *PLOS ONE* Staff (2016) Correction: Towards Developing an Initial Programme Theory: Programme Designers and Managers Assumptions on the Antiretroviral Treatment Adherence Club Programme in Primary Health Care Facilities in the Metropolitan Area of Western Cape Province, South Africa. *PLoS ONE* 11(11): e0166507. doi:10.1371/journal.pone.0166507

**Published:** November 9, 2016

**Copyright:** © 2016 The PLOS ONE Staff. This is an open access article distributed under the terms of the [Creative Commons Attribution License](#), which permits unrestricted use, distribution, and reproduction in any medium, provided the original author and source are credited.

### Reference

1. Mukumbang FC, van Belle S, Marchal B, van Wyk B (2016) Towards Developing an Initial Programme Theory: Programme Designers and Managers Assumptions on the Antiretroviral Treatment Adherence Club Programme in Primary Health Care Facilities in the Metropolitan Area of Western Cape Province, South Africa. *PLoS ONE* 11(8): e0161790. doi:10.1371/journal.pone.0161790 PMID: 27560352
